# Supplementary material
Source: PubMed Central journal article supplement (PMC3046033)
Supplement: 97320630005310S1.pdf [file 97320630005310S1.pdf]

## Supplementary material:

**Table 1:** Three Ligand chosen for Molecular Dynamics Study along with their docking scores (Autodock and Flexidock), key H bond residues and RMSD between Autodock and flexidock conformations.

| Ligand Zinc Binding Group | Structure                                                                           | Docking Energy (Autodock) (Kj/mol) | Docking Energy (Flexidock) | RMSD (Autodock & Flexidock) | H bond residues and distances                                                                         |
|---------------------------|-------------------------------------------------------------------------------------|------------------------------------|----------------------------|-----------------------------|-------------------------------------------------------------------------------------------------------|
| Carboxylic Group          | 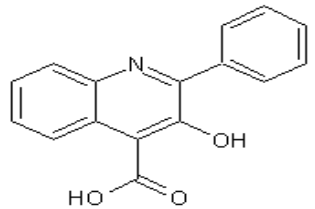   | -6.09                              | -297.64                    | 0.093 Å                     | Ala 189 (1.824 Å)<br>Leu 188 (1.810 Å)                                                                |
| Sulfonamide Hydroxamate   |    | -9.04                              | -498.68                    | 0.533 Å                     | Leu 188 (2.325 Å)<br>Ala 189 (1.856 Å)<br>Gln 402 (2.265 Å)<br>His 276 (2.924 Å)<br>His 411 (1.903 Å) |
| Thio ester based ZBG      |  | -10.02                             | -642.45                    | 0.078 Å                     | Leu 188 (2.292 Å)<br>Ala 189 (2.217 Å)<br>Tyr 420 (2.409 Å)<br>Pro 421 (3.459 Å)<br>Tyr 423 (1.747 Å) |
